# Supplementary material for: Gynomonoecy in a mycoheterotrophic orchid Eulophia zollingeri with autonomous selfing hermaphroditic flowers and putatively outcrossing female flowers
Source: PeerJ journal article supplement (doi:10.7717/peerj.10272), 2020-10-27
Supplement: Figure_S1.pdf [file Figure_S1.pdf]

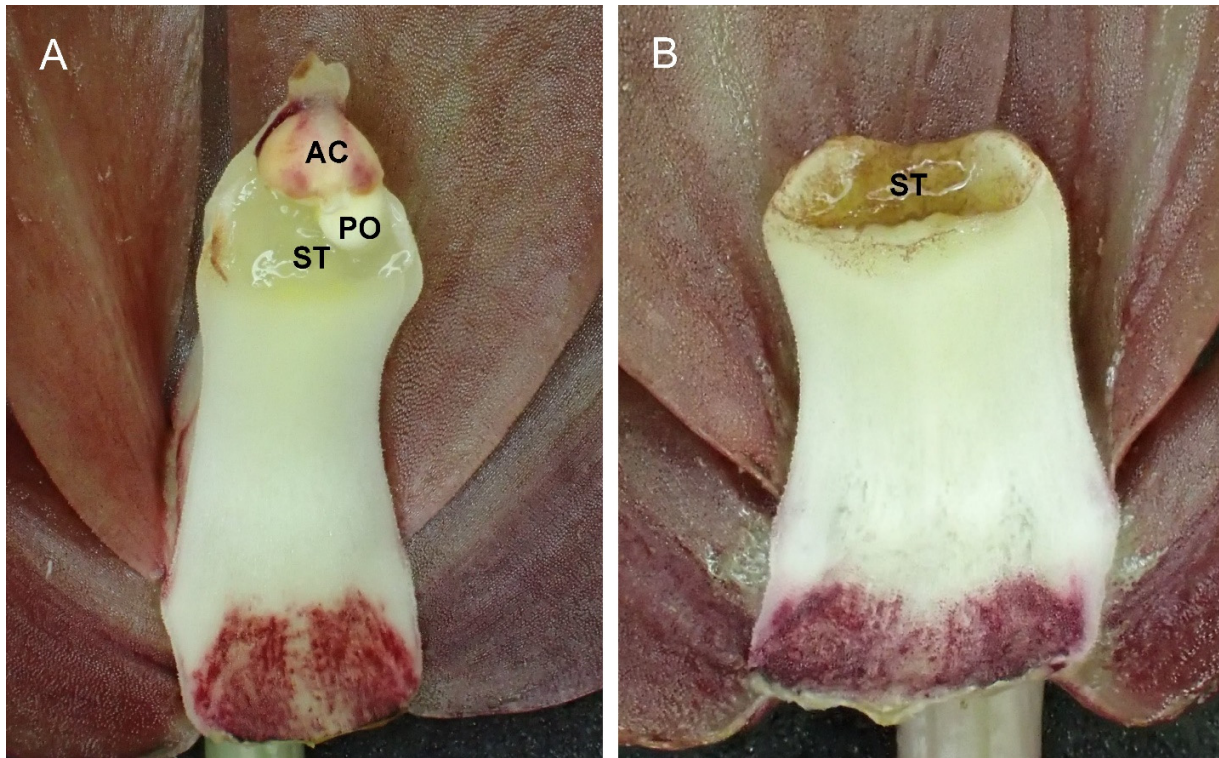

**Figure S1 Column morphology of *Eulophia zollingeri* flowers in Ogimi-son, Okinawa, Japan.** (A) Column with a degenerate rostellum, which facilitates autogamy. (B) Column with neither a rostellum nor anther cap and pollinaria. AC, anther cap; PO, pollinaria; ST, stigma.
