# Supplementary material for: Gynomonoecy in a mycoheterotrophic orchid Eulophia zollingeri with autonomous selfing hermaphroditic flowers and putatively outcrossing female flowers
Source: PeerJ. 2020 Oct 27;8:e10272. doi: 10.7717/peerj.10272 (PMC7597633; doi:10.7717/peerj.10272)
Supplement: Supplemental Information 1 [file peerj-08-10272-s001.xlsx]

## Sheet: Table S1
Table S1. The relative position of female and hermaphroditic flowers on the racemes in Eulophia zollingeri.
	1	2	3	4	5	6	7	8	9	10	11	12
Number of flower
1	H	H	H	H	F	H	H	H	H	H	H	H
2	H	H	H	H	H	H	H	H	F	H	F	H
3	H	Ｆ	H	H	H	H	F	H	H	H	H	F
4	H	H	H	H	H	F	H	H	H	H	H	F
5	H	H	H	F	H	H	H	H	H	H	F	H
6	H	H	H	F	H	F	H	H	H	H	H	H
7	F	H	H	F	H		F	H	H	H	F	H
8	H	F	H	H			H	H	H	H	F	H
9	H		H	H			H	H	H	H		F
10	F		H	H			H	F	H	H		H
11	F		H					F	H	H		F
12			H					F	H	H		F
13			H					F	F	H
14			H					H	H	H
15			H					F	H	H
16			H					F	F	F
17			H					H	H	F
18			H					F	F	H
19			H					F	F	F
20			H					F	H	H
21			H					F	H	F
22			H					F	F	H
23			H					F		H
24			H					F		H
25			H					H		H
26			H					F		H
27			H					F		H
28			H					F		H
29										F
30										H
31										F
32										F
33										F
34										F
Number 1 indicates the most distal flower, while each last number indicates the most basal flower. H indicates hermaphroditic flowers, while F indicates female flowers.
