# Supplementary material for: Gynomonoecy in a mycoheterotrophic orchid Eulophia zollingeri with autonomous selfing hermaphroditic flowers and putatively outcrossing female flowers
Source: PeerJ. 2020 Oct 27;8:e10272. doi: 10.7717/peerj.10272 (PMC7597633; doi:10.7717/peerj.10272)
Supplement: Supplemental Information 2 [file peerj-08-10272-s002.xlsx]

## Sheet: Table S2
Table S2. Raw data of the length of the dorsal sepal, lateral sepal, lateral petal, and lip between hermaphroditic and female flowers in Eulophia zollingeri.
Dorsal sepal (mm)		Lateral setal (mm)		Lateral petal (mm)		Lip (mm)
Hermaphroditic	Female	Hermaphroditic	Female	Hermaphroditic	Female	Hermaphroditic	Female
22.9	24.7	26.3	25.8	16.2	15.9	19.2	21
25.7	28	28.4	23.5	19.1	18.2	19.3	18.3
24.9	25.8	24.5	28	17.2	19.6	20.2	20.3
24.2	23.7	26.6	26	19.9	18.7	20.7	18.9
23.8	23.6	26.1	25.4	18.1	19.3	19.9	19.5
25	23.4	27.8	25.1	19.6	17.6	20.6	20.5
20.3	23.2	21.7	24.2	15.1	17.2	19.2	19.6
20.7	24.5	22.9	27.3	16.7	18.2	18.6	20.3
24.2	27	25.4	29.5	18.2	20	20.2	20.7
23.7	24.5	26.4	27	17.9	17.3	19.2	20.9
