# Supplementary material for: Gynomonoecy in a mycoheterotrophic orchid Eulophia zollingeri with autonomous selfing hermaphroditic flowers and putatively outcrossing female flowers
Source: PeerJ. 2020 Oct 27;8:e10272. doi: 10.7717/peerj.10272 (PMC7597633; doi:10.7717/peerj.10272)
Supplement: Supplemental Information 4 [file peerj-08-10272-s004.xlsx]

## Sheet: Table S4
Table S4. Raw data of proportion of seeds with an embryo in Eulophia zollingeri among different pollination treatments.
Manual allogamy		Manual autogamy		Autonomous autogamy		Open
Hermaphroditic	Female	Hermaphroditic	Female	Hermaphroditic	Female	Hermaphroditic	Female
87	89	78	75	81	–	78	82
77	78	75	79	78	–	76	–
88	79	82	82	77	–	80	–
84	82	86	77	73	–	76	–
78	87	81	74	77	–	78	–
82	85	74	77	–	–	83	–
81	–	77	–	–	–	85	–
–	–	–	–	–	–	84	–
–	–	–	–	–	–	78	–
–	–	–	–	–	–	82	–
						76	–
						74	–
						–	–
						–	–
						–	–
						–	–
						–	–
						–	–
						–	–
						–
						–
– indicates flowers that failed to develop fruit capsules.
